# Supplementary material for: Predicting 30-day mortality of patients with pneumonia in an emergency department setting using machine-learning models
Source: PubMed Central journal article supplement — Clin Exp Emerg Med. 2020 Sep 30;7(3):197–205. doi: 10.15441/ceem.19.052 (PMC7550804; doi:10.15441/ceem.19.052), 2020-09-30
Supplement: ceem-19-052-appendix1.pdf [file ceem-19-052-appendix1.pdf]

## Appendix 1. Variables used for each model

| Variable                             | CURB-65 | CURB-RF | E-CURB-RF |
|--------------------------------------|---------|---------|-----------|
| Age                                  | ○       | ○       | ○         |
| Sex                                  | -       | -       | ○         |
| BMI (kg/m <sup>2</sup> )             | -       | -       | ○         |
| Nursing home residence               | -       | -       | ○         |
| SBP (mmHg)                           | ○       | ○       | ○         |
| DBP (mmHg)                           | ○       | ○       | ○         |
| Heart rate (/min)                    | -       | -       | ○         |
| Respiratory rate (/min)              | ○       | ○       | ○         |
| Body temperature (°C)                | -       | -       | ○         |
| SpO <sub>2</sub> (%)                 | -       | -       | ○         |
| Presence of confusion                | ○       | ○       | ○         |
| Respiratory support                  | -       | -       | ○         |
| Type of Pneumonia                    | -       | -       | ○         |
| Pleural effusion on radiology        | -       | -       | ○         |
| WBC (× 10 <sup>3</sup> /μL)          | -       | -       | ○         |
| Segmented neutrophils (%)            | -       | -       | ○         |
| ANC (× 10 <sup>3</sup> /μL)          | -       | -       | ○         |
| Hemoglobin (g/dL)                    | -       | -       | ○         |
| Platelet (× 10 <sup>3</sup> /μL)     | -       | -       | ○         |
| Potassium (K <sup>+</sup> ) (mmol/L) | -       | -       | ○         |
| PT (INR)                             | -       | -       | ○         |
| BUN (mg/dL)                          | ○       | ○       | ○         |
| Creatinine (mg/dL)                   | -       | -       | ○         |
| Glucose (mg/dL)                      | -       | -       | ○         |
| Protein (g/dL)                       | -       | -       | ○         |
| Albumin (g/dL)                       | -       | -       | ○         |
| Bilirubin (mg/dL)                    | -       | -       | ○         |
| D-dimer (ug/mL)                      | -       | -       | ○         |
| Total CO <sub>2</sub> (mmol/L)       | -       | -       | ○         |
| NT-pro BNP (pg/mL)                   | -       | -       | ○         |
| Lactic acid (mmol/L)                 | -       | -       | ○         |
| C-reactive protein (mg/dL)           | -       | -       | ○         |
| Procalcitonin (ng/mL)                | -       | -       | ○         |
| pH (ABGA) (pH)                       | -       | -       | ○         |
| pCO <sub>2</sub> (ABGA) (mmHg)       | -       | -       | ○         |
| Hypertension                         | -       | -       | ○         |
| Diabetes mellitus                    | -       | -       | ○         |
| Chronic lung disease                 | -       | -       | ○         |
| Chronic liver disease                | -       | -       | ○         |
| Congestive heart failure             | -       | -       | ○         |
| Cerebrovascular accident             | -       | -       | ○         |
| Chronic kidney disease               | -       | -       | ○         |
| Lung cancer                          | -       | -       | ○         |
| Solid cancer except lung cancer      | -       | -       | ○         |
| Lung metastasis                      | -       | -       | ○         |
| Hematologic malignancy               | -       | -       | ○         |
| Lymphoma                             | -       | -       | ○         |

BMI, body mass index; SBP, systolic blood pressure; DBP, diastolic blood pressure; SpO<sub>2</sub>, peripheral capillary oxygen saturation; WBC, white blood cell; ANC, absolute neutrophil count; PT, prothrombin time; INR, international normalized ratio; BUN, blood urea nitrogen; NT-pro BNP, N-terminal pro b-type natriuretic peptide; ABGA, arterial blood gas analysis.
