# Supplementary material for: Predicting 30-day mortality of patients with pneumonia in an emergency department setting using machine-learning models
Source: PubMed Central journal article supplement — Clin Exp Emerg Med. 2020 Sep 30;7(3):197–205. doi: 10.15441/ceem.19.052 (PMC7550804; doi:10.15441/ceem.19.052), 2020-09-30
Supplement: ceem-19-052-appendix2.pdf [file ceem-19-052-appendix2.pdf]

Appendix 2. Basic characteristics of the study subjects stratified by death within 30 days and ICU admission

|                             | Alive              |                         |         | Death within 30-day |                        |         |
|-----------------------------|--------------------|-------------------------|---------|---------------------|------------------------|---------|
|                             | No ICU (n = 1,259) | ICU admission (n = 115) | P-value | No ICU (n = 295)    | ICU admission (n = 63) | P-value |
| Male                        | 745 (59.2)         | 81 (70.4)               | 0.024   | 213 (72.7)          | 50 (79.4)              | 0.312   |
| Age                         | 67 (57–77)         | 67 (57–76)              | 0.785   | 70 (62–78)          | 70 (57.5–75.5)         | 0.284   |
| BMI                         | 22.6 (19.9–25)     | 22.3 (20.1–25.7)        | 0.607   | 20.9 (17.6–23.3)    | 20.9 (18.8–24.4)       | 0.237   |
| Nursing home resident       | 39 (3.1)           | 3 (2.6)                 | 0.993   | 20 (6.8)            | 1 (1.6)                | 0.195   |
| Pneumonia                   |                    |                         |         |                     |                        |         |
| CAP                         | 896 (71.7)         | 67 (58.8)               | 0.009   | 98 (33.3)           | 26 (41.3)              | 0.168   |
| HAP                         | 51 (4.1)           | 9 (7.9)                 |         | 20 (6.8)            | 7 (11.1)               |         |
| HCAP                        | 302 (24.2)         | 38 (33.3)               |         | 176 (59.9)          | 30 (47.6)              |         |
| Intubation                  | 0 (0)              | 37 (32.2)               | <0.001  | 1 (0.3)             | 17 (27.0)              | <0.001  |
| Hypertension                | 363 (28.8)         | 30 (26.1)               | 0.606   | 95 (32.2)           | 19 (30.2)              | 0.867   |
| DM                          | 237 (18.8)         | 26 (22.6)               | 0.388   | 51 (17.3)           | 16 (25.4)              | 0.187   |
| Chronic lung disease        | 263 (20.9)         | 28 (24.3)               | 0.453   | 85 (28.8)           | 15 (23.8)              | 0.516   |
| Chronic liver disease       | 45 (3.6)           | 5 (4.3)                 | 0.870   | 21 (7.1)            | 4 (6.3)                | 1.0     |
| CHF                         | 98 (7.8)           | 16 (13.9)               | 0.035   | 17 (5.8)            | 9 (14.3)               | 0.036   |
| CVA                         | 127 (10.1)         | 16 (13.9)               | 0.260   | 30 (10.2)           | 8 (12.7)               | 0.714   |
| CKD                         | 127 (10.1)         | 14 (12.2)               | 0.586   | 43 (14.6)           | 12 (19.0)              | 0.483   |
| Cancer                      |                    |                         |         |                     |                        |         |
| Lung cancer                 | 155 (12.3)         | 10 (8.7)                | 0.321   | 87 (29.5)           | 22 (34.9)              | 0.484   |
| Solid cancer                | 169 (13.4)         | 15 (13.0)               | 0.949   | 78 (26.4)           | 6 (9.5)                |         |
| Lung metastasis             | 33 (2.6)           | 2 (1.7)                 | 0.791   | 20 (6.8)            | 4 (6.3)                | 1.0     |
| Hematologic cancer          | 30 (2.4)           | 1 (0.9)                 | 0.473   | 16 (5.4)            | 8 (12.7)               | 0.069   |
| Lymphoma                    | 23 (1.8)           | 3 (2.6)                 | 0.817   | 10 (3.4)            | 3 (4.8)                | 0.875   |
| Confusion                   | 77 (6.1)           | 15 (13.0)               | 0.008   | 39 (13.2)           | 6 (9.5)                | 0.552   |
| SBP                         | 127 (111–143)      | 121 (97.7–146.7)        | 0.114   | 120.5 (105–137)     | 120 (102–140.5)        | 0.857   |
| DBP                         | 72 (64–83)         | 67 (58–81.7)            | 0.005   | 69 (60–78.2)        | 70 (56–80.5)           | 0.727   |
| Heart rate                  | 99 (86–113)        | 107 (92–126)            | <0.001  | 107 (91–120)        | 116.5 (103–132)        | 0.002   |
| Respiratory rate            | 20 (18–20)         | 22 (20–24)              | <0.001  | 20 (19–24)          | 24 (20–29.5)           | <0.001  |
| Body temperature            | 37.5 (36.9–38.3)   | 37.7 (37.1–38.5)        | 0.089   | 37.4 (36.8–38)      | 37.6 (37–38.1)         | 0.339   |
| SpO2                        | 96 (94–98)         | 92 (83.5–95)            | <0.001  | 95 (91–97)          | 93 (88–97.5)           | 0.198   |
| Pleural effusion on X-ray   | 278 (22.1)         | 36 (31.3)               | 0.032   | 117 (39.7)          | 26 (41.3)              | 0.924   |
| Laboratory finding          |                    |                         |         |                     |                        |         |
| pH                          | 7.46 (7.43–7.49)   | 7.44 (7.38–7.48)        | <0.001  | 7.46 (7.42–7.50)    | 7.45 (7.41–7.50)       | 0.326   |
| pCO <sub>2</sub>            | 32.5 (28.7–37.1)   | 32.3 (28.3–39.5)        | 0.338   | 31.4 (27.2–37)      | 29.9 (24.0–36.3)       | 0.093   |
| Lactic acid                 | 1.43 (1.11–1.93)   | 2.43 (1.55–3.66)        | <0.001  | 1.83 (1.36–2.59)    | 2.85 (1.87–4.36)       | <0.001  |
| Procalcitonin               | 0.21 (0.1–0.66)    | 0.96 (0.27–7.65)        | <0.001  | 0.4 (0.18–1.3)      | 1.02 (0.20–7.02)       | 0.022   |
| C-reactive protein          | 7.86 (2.98–15.1)   | 13.38 (4.65–25.1)       | <0.001  | 10.97 (5.36–18.6)   | 15.2 (9.03–23.7)       | 0.014   |
| WBC                         | 9.64 (7.09–13.54)  | 9.62 (5.47–15.33)       | 0.539   | 10.21 (6.74–14.8)   | 9.65 (5.45–15.7)       | 0.601   |
| Segmented neutrophils       | 77.4 (69–84.3)     | 77.5 (67.1–85.7)        | 0.928   | 81.9 (71.7–86.9)    | 80.6 (62.9–86.8)       | 0.240   |
| ANC                         | 7.42 (5–11.01)     | 7.01 (3.58–11.9)        | 0.440   | 8.40 (5.08–12.14)   | 7.48 (3.23–12.59)      | 0.174   |
| Hemoglobin                  | 12.6 (11.2–13.9)   | 12.7 (11.2–14.4)        | 0.576   | 10.9 (9.4–12.35)    | 10.8 (9.35–12.0)       | 0.826   |
| Platelet                    | 223 (169–286.5)    | 200 (151–277)           | 0.036   | 228 (134.5–316)     | 165 (84.5–284)         | 0.017   |
| BUN                         | 14.5 (10.6–20.7)   | 20 (13.5–30.2)          | <0.001  | 18.2 (12.4–30.7)    | 22.6 (15.5–42.3)       | 0.009   |
| Creatinine                  | 0.83 (0.67–1.06)   | 1 (0.70–1.63)           | 0.001   | 0.86 (0.66–1.32)    | 1.01 (0.75–2.13)       | 0.020   |
| Glucose                     | 125 (109–159)      | 142.5 (120–182)         | <0.001  | 129 (110–161.5)     | 153.5 (118–211)        | 0.007   |
| Potassium (K <sup>+</sup> ) | 4.2 (3.9–4.5)      | 4.2 (3.9–4.7)           | 0.613   | 4.3 (4–4.8)         | 4.4 (3.9–4.8)          | 0.739   |
| PT (INR)                    | 1.09 (1.02–1.18)   | 1.16 (1.06–1.29)        | <0.001  | 1.15 (1.07–1.3)     | 1.24 (1.13–1.45)       | <0.001  |
| Protein                     | 6.5 (6–7)          | 6 (5.5–6.6)             | <0.001  | 6.25 (5.6–6.9)      | 6 (5.32–6.5)           | 0.046   |
| Albumin                     | 3.8 (3.4–4.2)      | 3.5 (3–3.9)             | <0.001  | 3.3 (3–3.7)         | 3.2 (2.9–3.4)          | 0.022   |
| Bilirubin                   | 0.8 (0.6–1.1)      | 0.85 (0.6–1.27)         | 0.219   | 0.8 (0.6–1.2)       | 1 (0.7–1.8)            | 0.004   |
| D-dimer                     | 1.36 (0.68–2.48)   | 2.16 (1.13–3.93)        | <0.001  | 2.79 (1.40–5.02)    | 3.06 (1.89–7.08)       | 0.288   |

(continued to the next page)

## Appendix 2. Continued

|            | Alive               |                         |         | Death within 30-day |                        |         |
|------------|---------------------|-------------------------|---------|---------------------|------------------------|---------|
|            | No ICU (n = 1,259)  | ICU admission (n = 115) | P-value | No ICU (n = 295)    | ICU admission (n = 63) | P-value |
| TCO2       | 20.8 (18.7–22.8)    | 19.3 (16.4–21.4)        | 0.043   | 21.3 (18.8–23.8)    | 17.9 (16.5–20)         | < 0.001 |
| NT-pro BNP | 984.4 (213.3–3,102) | 1,450.5 (296.5–4,390)   | 0.003   | 1,794 (776.5–5,757) | 2,328 (1316.5–8,713.5) | 0.237   |
| CURB-65    |                     |                         | < 0.001 |                     |                        | < 0.001 |
| 0 Score    | 480 (38.1)          | 29 (25.2)               |         | 81 (27.5)           | 12 (19.0)              |         |
| 1 Score    | 557 (44.2)          | 35 (30.4)               |         | 129 (43.7)          | 15 (23.8)              |         |
| 2 Score    | 186 (14.8)          | 20 (17.4)               |         | 56 (19.0)           | 20 (31.7)              |         |
| 3 Score    | 33 (2.6)            | 23 (20.0)               |         | 25 (8.5)            | 12 (19.0)              |         |
| 4 Score    | 3 (0.2)             | 7 (6.1)                 |         | 4 (1.4)             | 3 (4.8)                |         |
| 5 Score    | 0 (0.0)             | 1 (0.9)                 |         | 0 (0.0)             | 1 (1.6)                |         |

Values are presented as number (%) or median (interquartile range).

ICU, intensive care unit; BMI, body mass index; CAP, community-acquired pneumonia; HAP, hospital-acquired pneumonia; HCAP, health care-associated pneumonia; DM, diabetes mellitus; CHF, congestive heart failure; CVA, cerebrovascular accident; CKD, chronic kidney disease; SBP, systolic blood pressure; DBP, diastolic blood pressure; SpO<sub>2</sub>, peripheral capillary oxygen saturation; pCO<sub>2</sub>, partial pressure of carbon dioxide; WBC, white blood cell; ANC, absolute neutrophil count; BUN, blood urea nitrogen; PT, prothrombin time; INR, international normalized ratio; TCO<sub>2</sub>, total carbon dioxide; NT-pro BNP, N-terminal pro b-type natriuretic peptide.

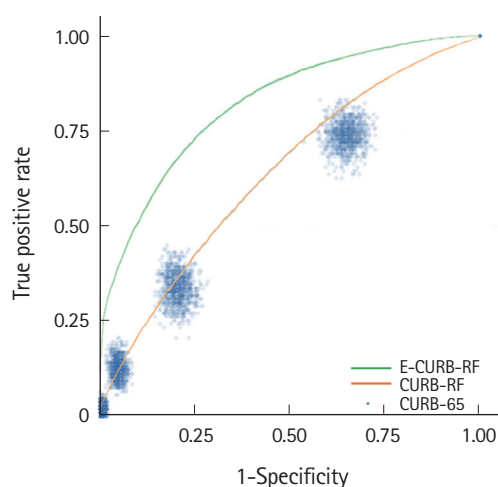

**Appendix 3.** Comparison of receiver operating characteristics curves among the three models for 30-day mortality.
