# Supplementary material for: Predicting 30-day mortality of patients with pneumonia in an emergency department setting using machine-learning models
Source: PubMed Central journal article supplement — Clin Exp Emerg Med. 2020 Sep 30;7(3):197–205. doi: 10.15441/ceem.19.052 (PMC7550804; doi:10.15441/ceem.19.052), 2020-09-30
Supplement: ceem-19-052-appendix3.pdf [file ceem-19-052-appendix3.pdf]

Appendix 2. Continued

|            | Alive               |                         |         | Death within 30-day |                        |         |
|------------|---------------------|-------------------------|---------|---------------------|------------------------|---------|
|            | No ICU (n = 1,259)  | ICU admission (n = 115) | P-value | No ICU (n = 295)    | ICU admission (n = 63) | P-value |
| TCO2       | 20.8 (18.7–22.8)    | 19.3 (16.4–21.4)        | 0.043   | 21.3 (18.8–23.8)    | 17.9 (16.5–20)         | < 0.001 |
| NT-pro BNP | 984.4 (213.3–3,102) | 1,450.5 (296.5–4,390)   | 0.003   | 1,794 (776.5–5,757) | 2,328 (1316.5–8,713.5) | 0.237   |
| CURB-65    |                     |                         | < 0.001 |                     |                        | < 0.001 |
| 0 Score    | 480 (38.1)          | 29 (25.2)               |         | 81 (27.5)           | 12 (19.0)              |         |
| 1 Score    | 557 (44.2)          | 35 (30.4)               |         | 129 (43.7)          | 15 (23.8)              |         |
| 2 Score    | 186 (14.8)          | 20 (17.4)               |         | 56 (19.0)           | 20 (31.7)              |         |
| 3 Score    | 33 (2.6)            | 23 (20.0)               |         | 25 (8.5)            | 12 (19.0)              |         |
| 4 Score    | 3 (0.2)             | 7 (6.1)                 |         | 4 (1.4)             | 3 (4.8)                |         |
| 5 Score    | 0 (0.0)             | 1 (0.9)                 |         | 0 (0.0)             | 1 (1.6)                |         |

Values are presented as number (%) or median (interquartile range).

ICU, intensive care unit; BMI, body mass index; CAP, community-acquired pneumonia; HAP, hospital-acquired pneumonia; HCAP, health care-associated pneumonia; DM, diabetes mellitus; CHF, congestive heart failure; CVA, cerebrovascular accident; CKD, chronic kidney disease; SBP, systolic blood pressure; DBP, diastolic blood pressure; SpO2, peripheral capillary oxygen saturation; pCO2, partial pressure of carbon dioxide; WBC, white blood cell; ANC, absolute neutrophil count; BUN, blood urea nitrogen; PT, prothrombin time; INR, international normalized ratio; TCO2, total carbon dioxide; NT-pro BNP, N-terminal pro b-type natriuretic peptide.

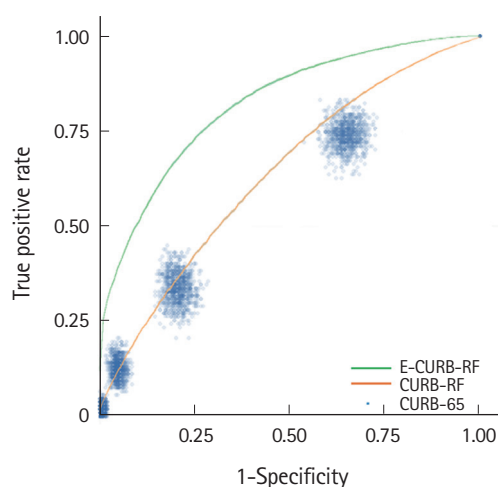

Appendix 3. Comparison of receiver operating characteristics curves among the three models for 30-day mortality.
